# Supplementary material for: Metal salt induced synthesis of hybrid metal core–siloxane shell nanoparticles and siloxane nanowires
Source: Royal Society of Chemistry journal article supplement (doi:10.1039/b919750h), 2010-01-01
Supplement: b919750h.pdf [file b919750h.pdf]

## Metal Salt Induced Synthesis of Hybrid Metal Core-Siloxane Shell Nanoparticles and Siloxane Nanowires

Anubha Goyal, Ashavani Kumar and Pulickel M. Ajayan

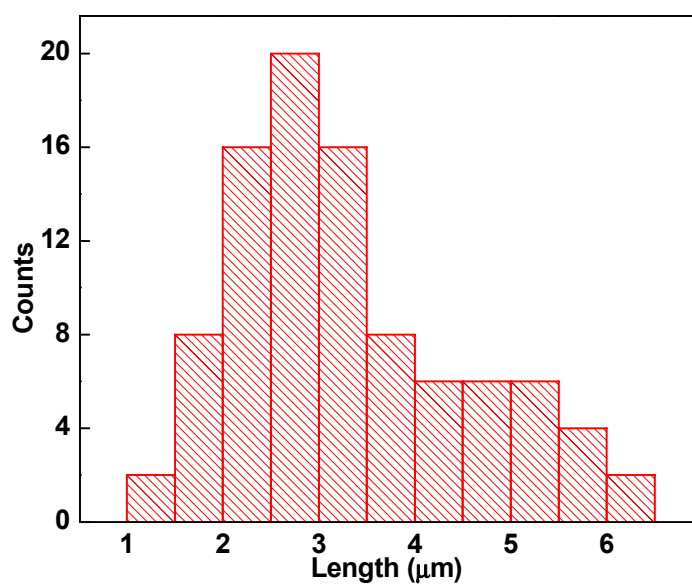

Fig. S1: Length distribution of the nanowires
